# Supplementary material
Source: PubMed Central journal article supplement (PMC10165690)
Supplement: NIHMS1874406-supplement-1.pdf [file NIHMS1874406-supplement-1.pdf]

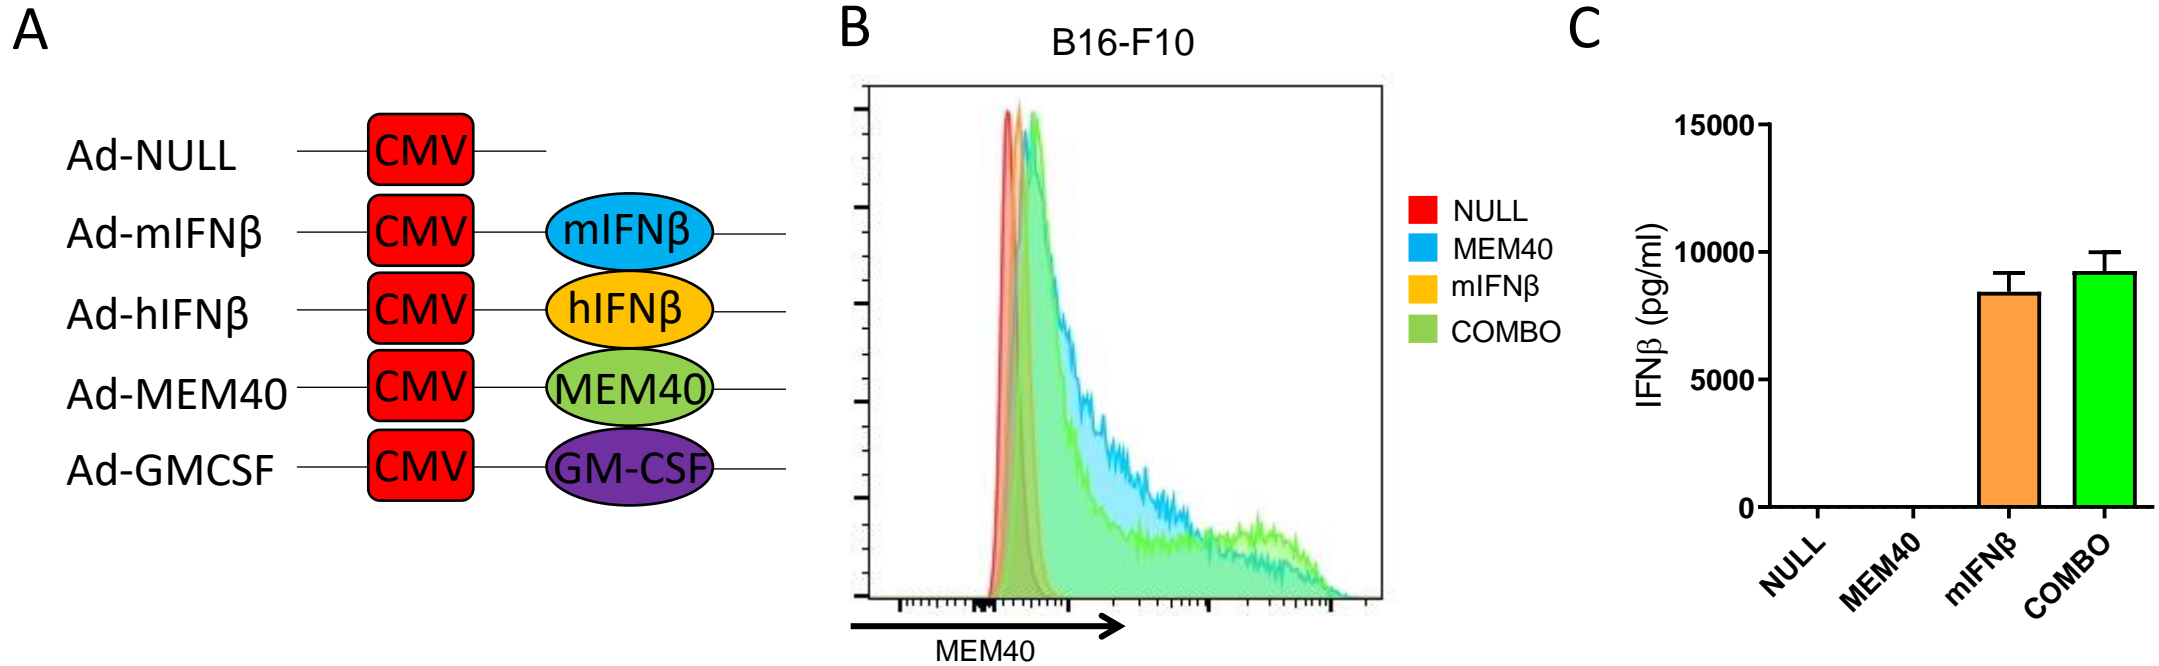

**Supplementary Fig. 1. Adenoviruses scheme and MEM40&IFN $\beta$  expression in B16-F10.** (A) Schematic representation of all replication-deficient adenoviruses used in paper. B16-F10 cells were infected with adenoviruses Ad-Null, Ad-MEM40, Ad-mIFN $\beta$  or Ad-MEM40+Ad-mIFN $\beta$ (Ad COMBO) at MOI=10. MEM40 expression was detected by flow cytometry (B) and secretion of IFN $\beta$  was detected by ELISA (C).

## Tumor DC gating

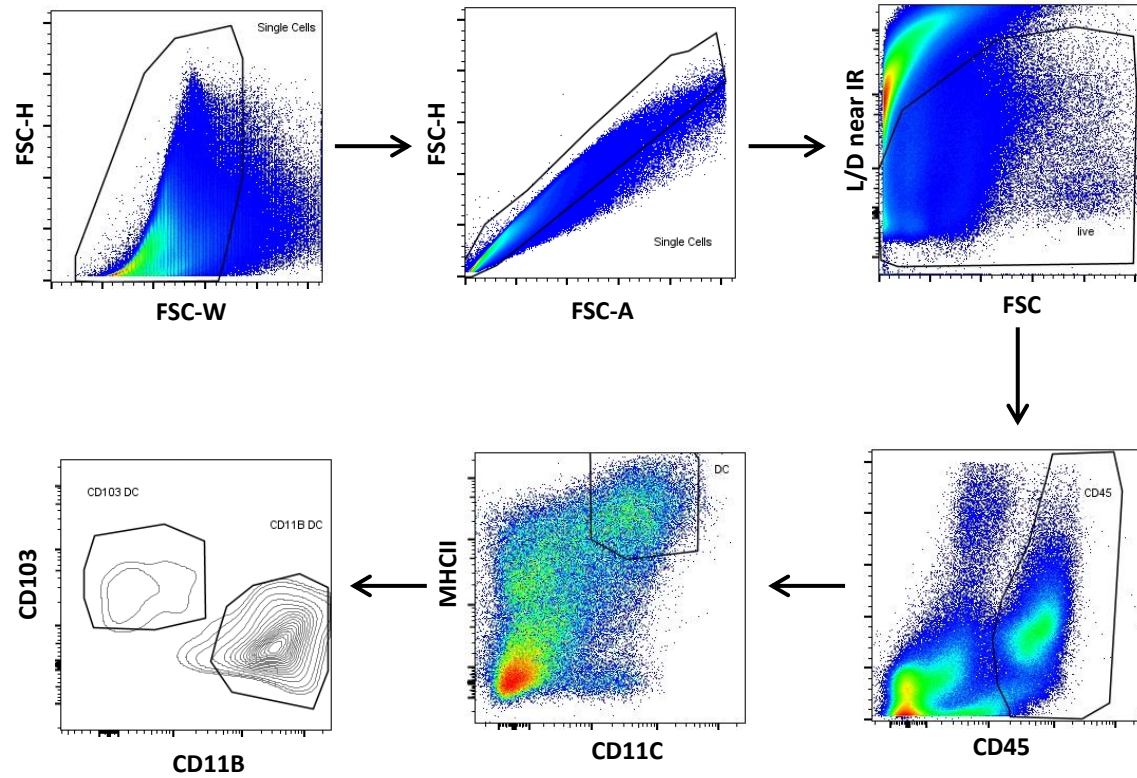

**Supplementary Fig. 2.** Flow cytometry analysis scheme of B16-F10 to detect populations of DCs in tumor.

### Tumor CD11b DC markers

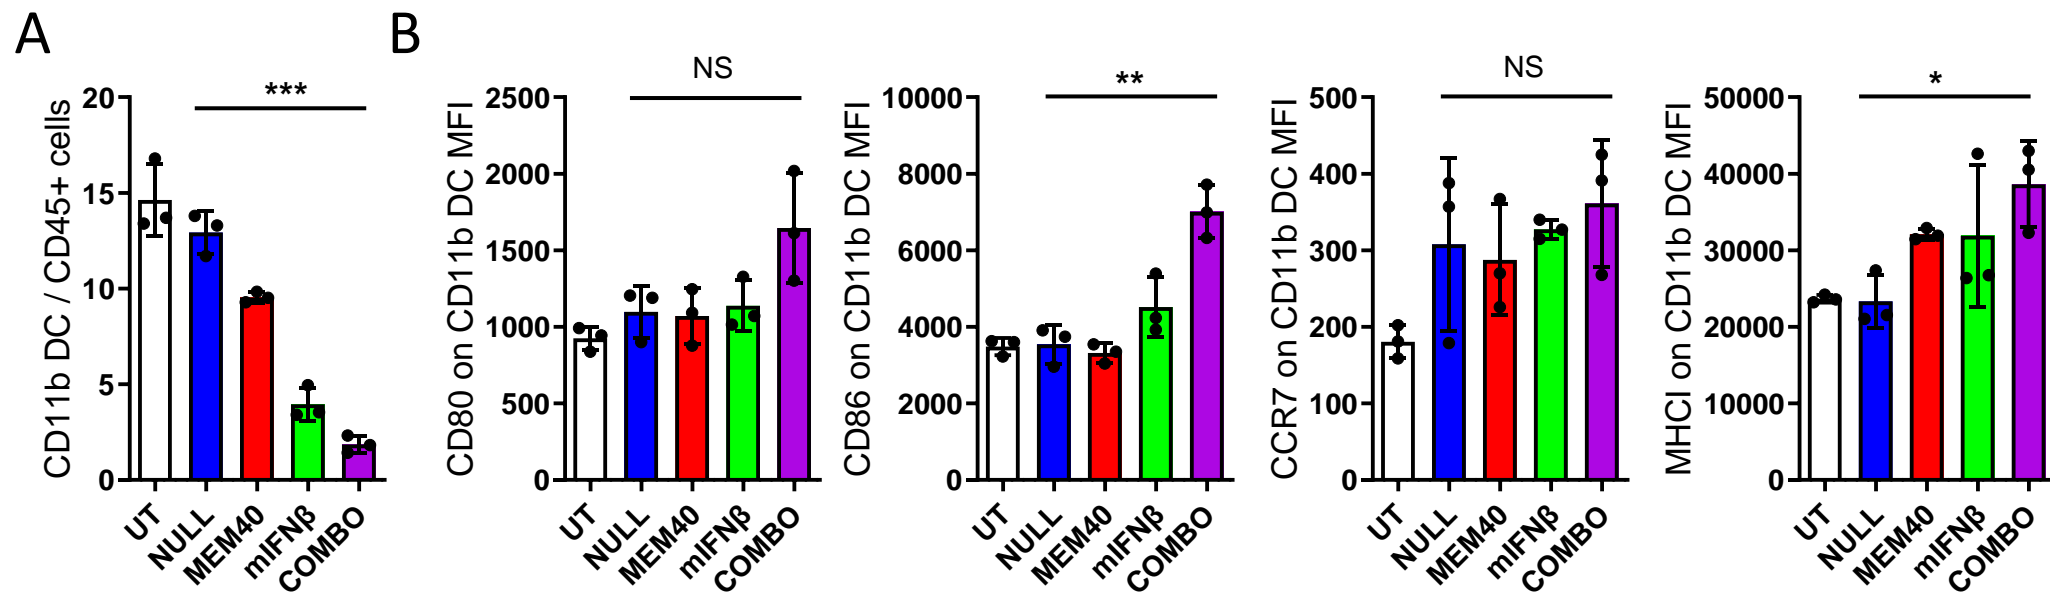

**Supplementary Fig. 3. Tumor levels and activation of cDC2.** Presence of CD11b<sup>+</sup>cDC2 (A) and indicated activation markers (B) on cDC2 are indicated.

A

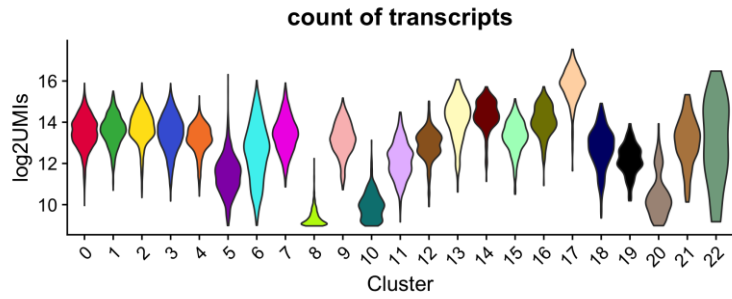

B

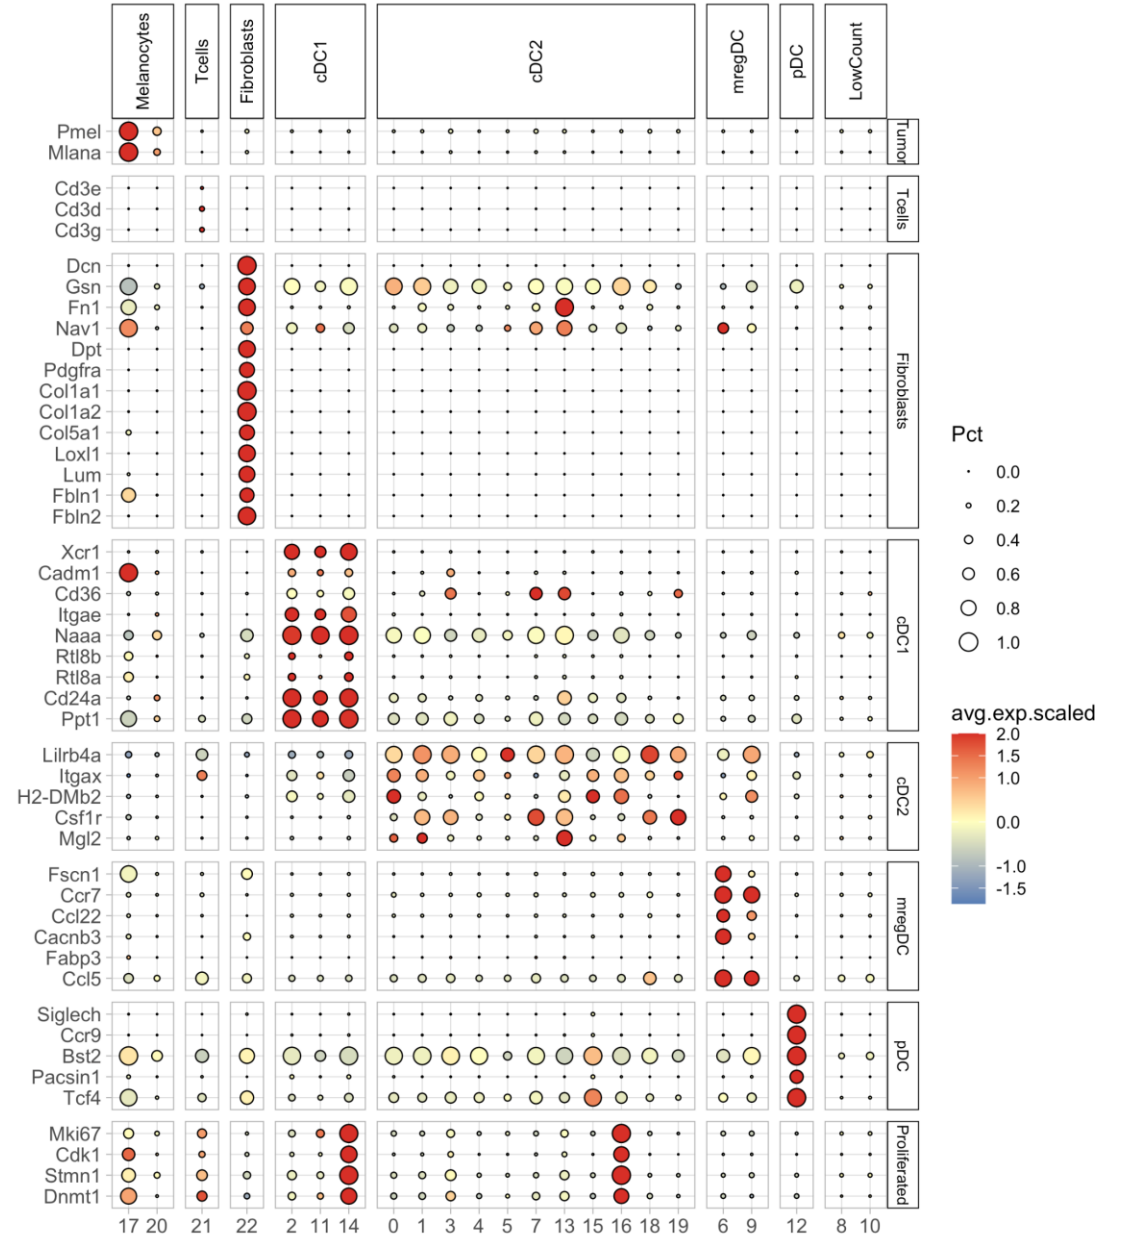

**Supplementary Fig. 4. Single cell RNA sequencing of tumor DCs.** (A) Transcript counts in indicated clusters. (B) Marker gene bubble plot showing gene-level average expression calculated for each cluster and then Z-score normalized.

# LN DC gating

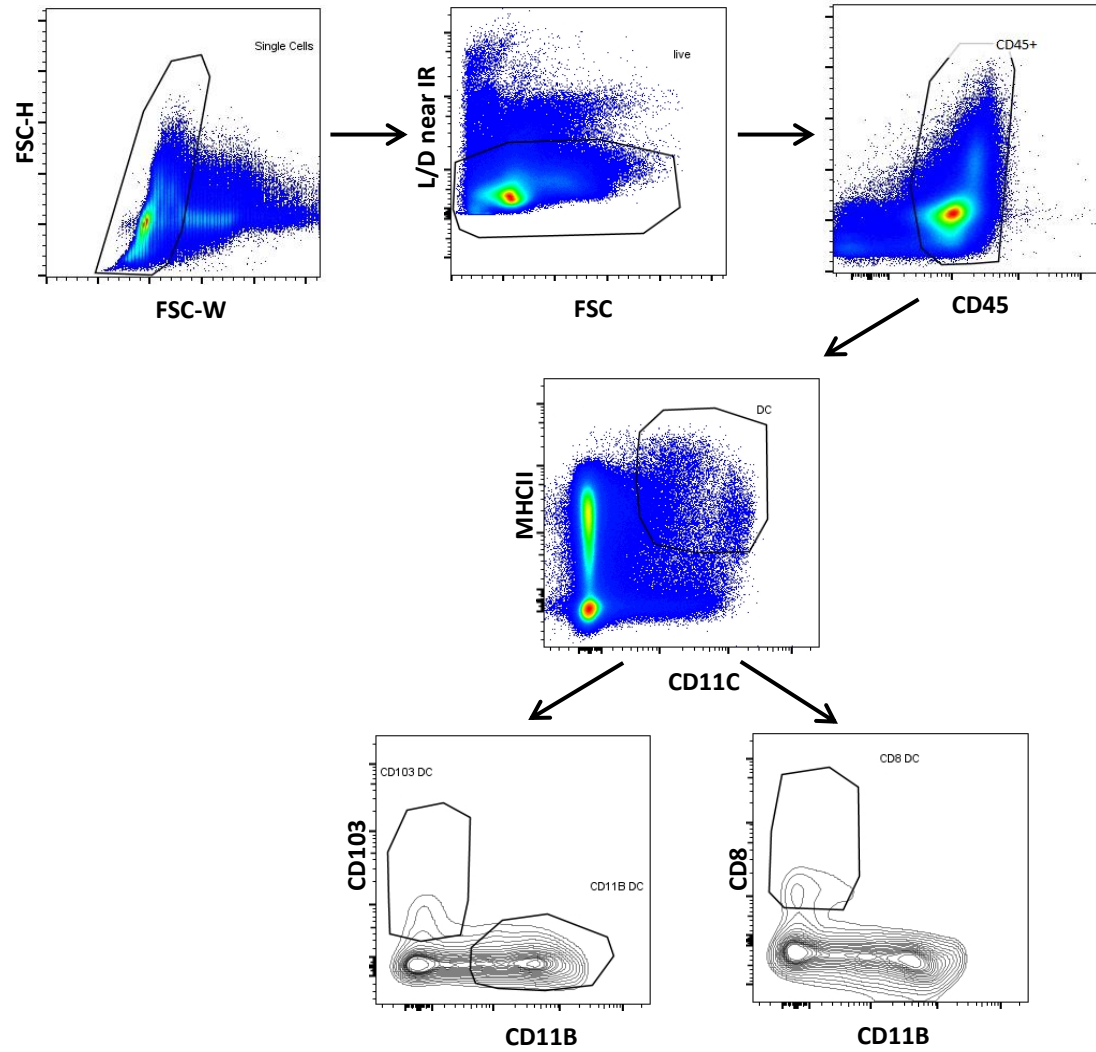

**Supplementary Fig. 5.** Flow cytometry analysis scheme of B16-F10 to detect populations of DCs in draining lymph nodes.

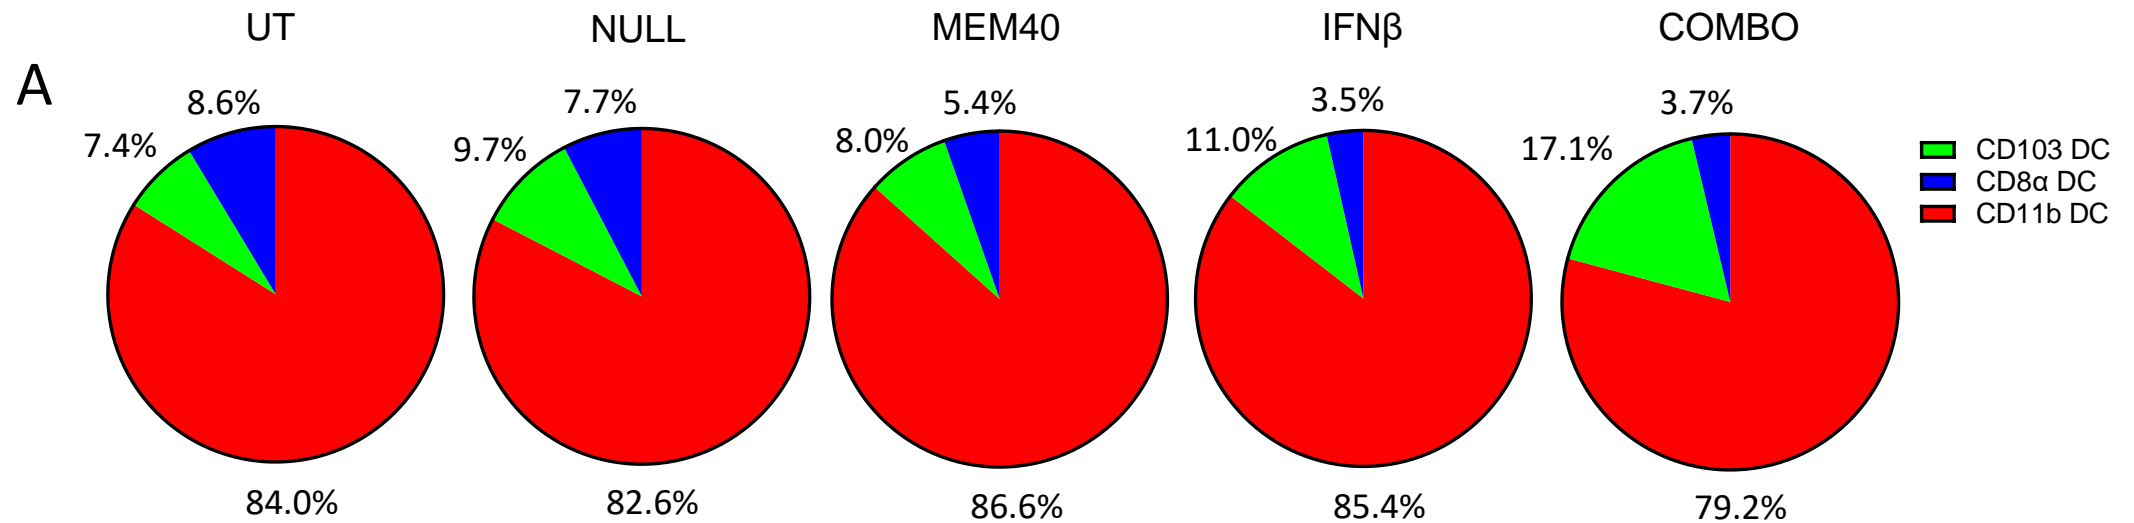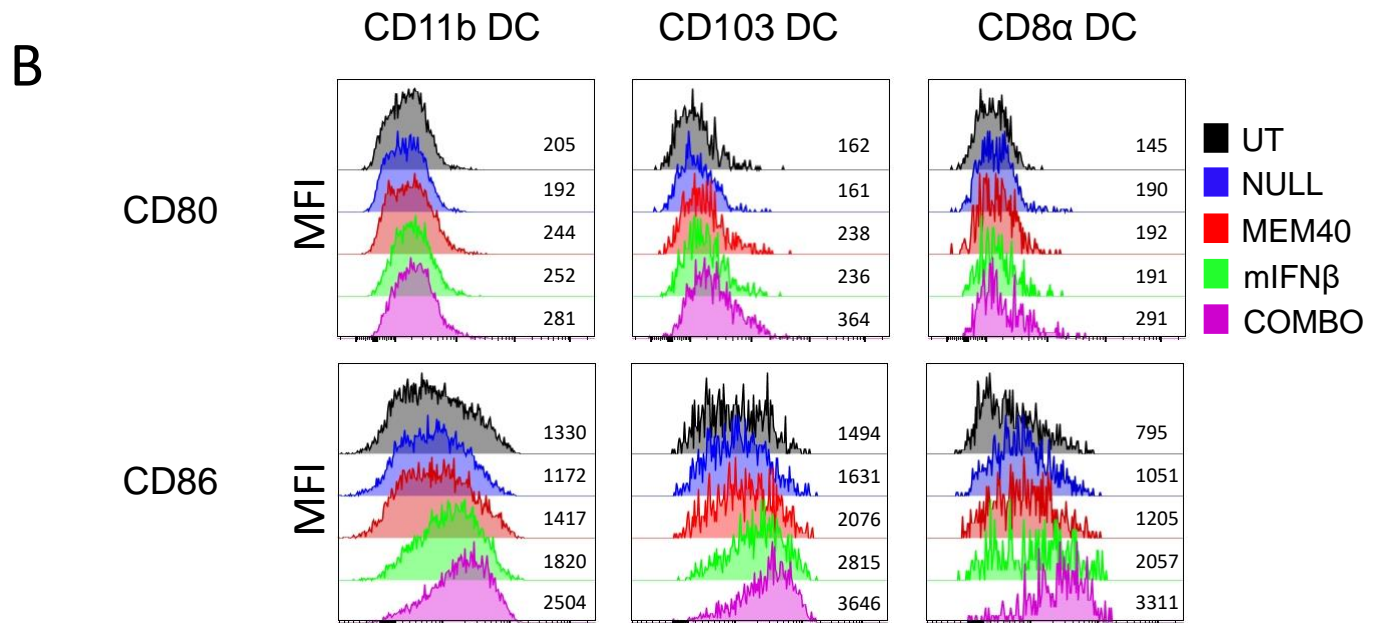

**Supplementary Fig. 6. MEM40 and IFN $\beta$  impact on lymph nodes cDCs.** (A) LNs of mice injected with indicated viruses were pooled and used to determine levels of indicated DC subsets. (B) Levels of CD80 and CD86 expression in CD11b<sup>+</sup>cDC2, CD103<sup>+</sup>cDC1 and CD8 $\alpha$ <sup>+</sup>cDC1 along with MFI are indicated.

Total tumor  
CD103 DC

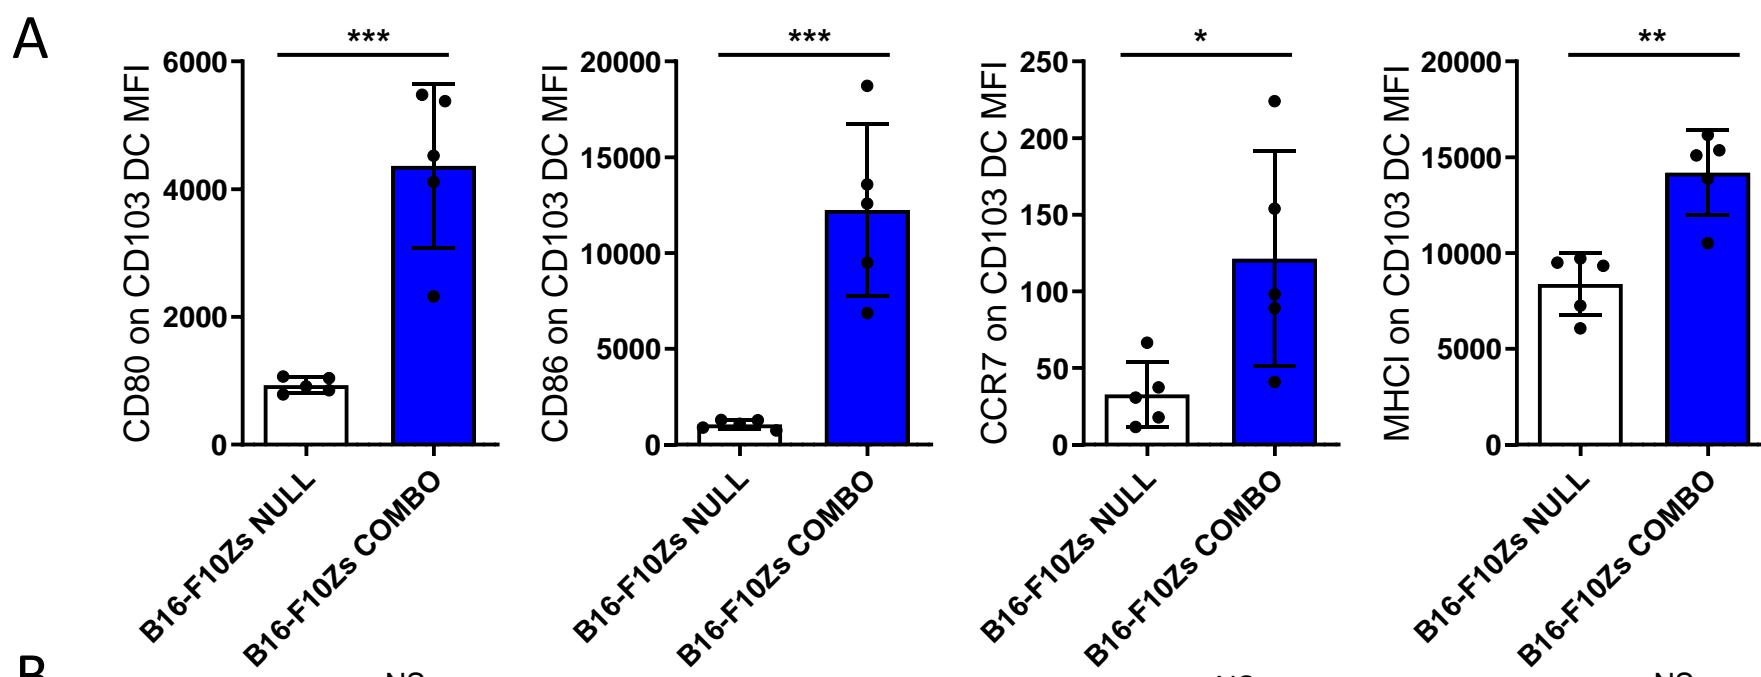

Zs-Green +/- tumor  
CD103 DC

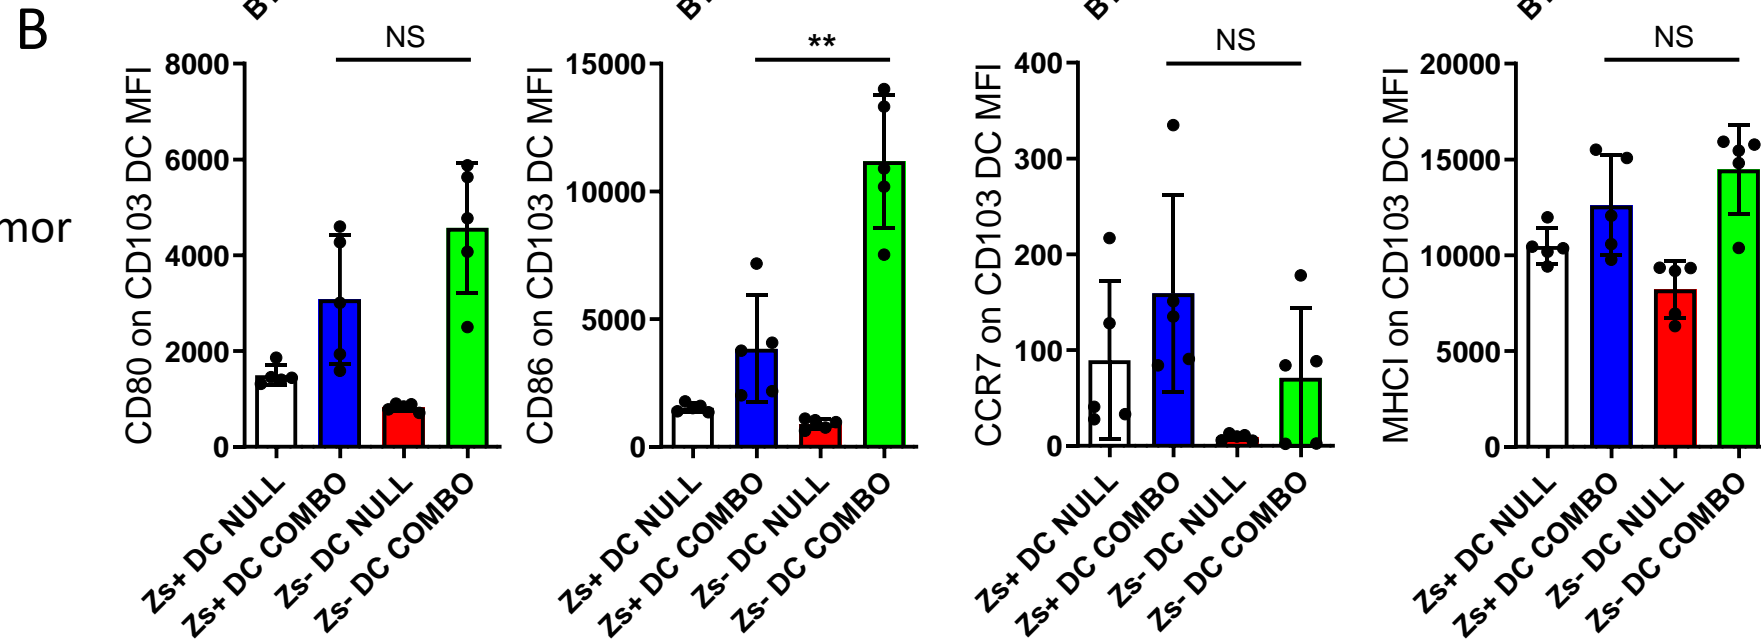

**Supplementary Fig. 7. MEM40 and IFN $\beta$  impact on tumor cDC1 in Zs-Green expressing B16-F10.** (A) Expression of indicated markers on tumor CD103<sup>+</sup>cDC1 after Ad-Null and Ad COMBO virus treatments. (B) Expression of markers were separately assessed on Zs-Green<sup>+</sup> and Zs-Green<sup>-</sup>CD103 tumor DC. T-test was used to determine significance of differences and indicated by p-values \*p<0.05, \*\*p<0.01, \*\*\*p<0.001. NS: not significant.

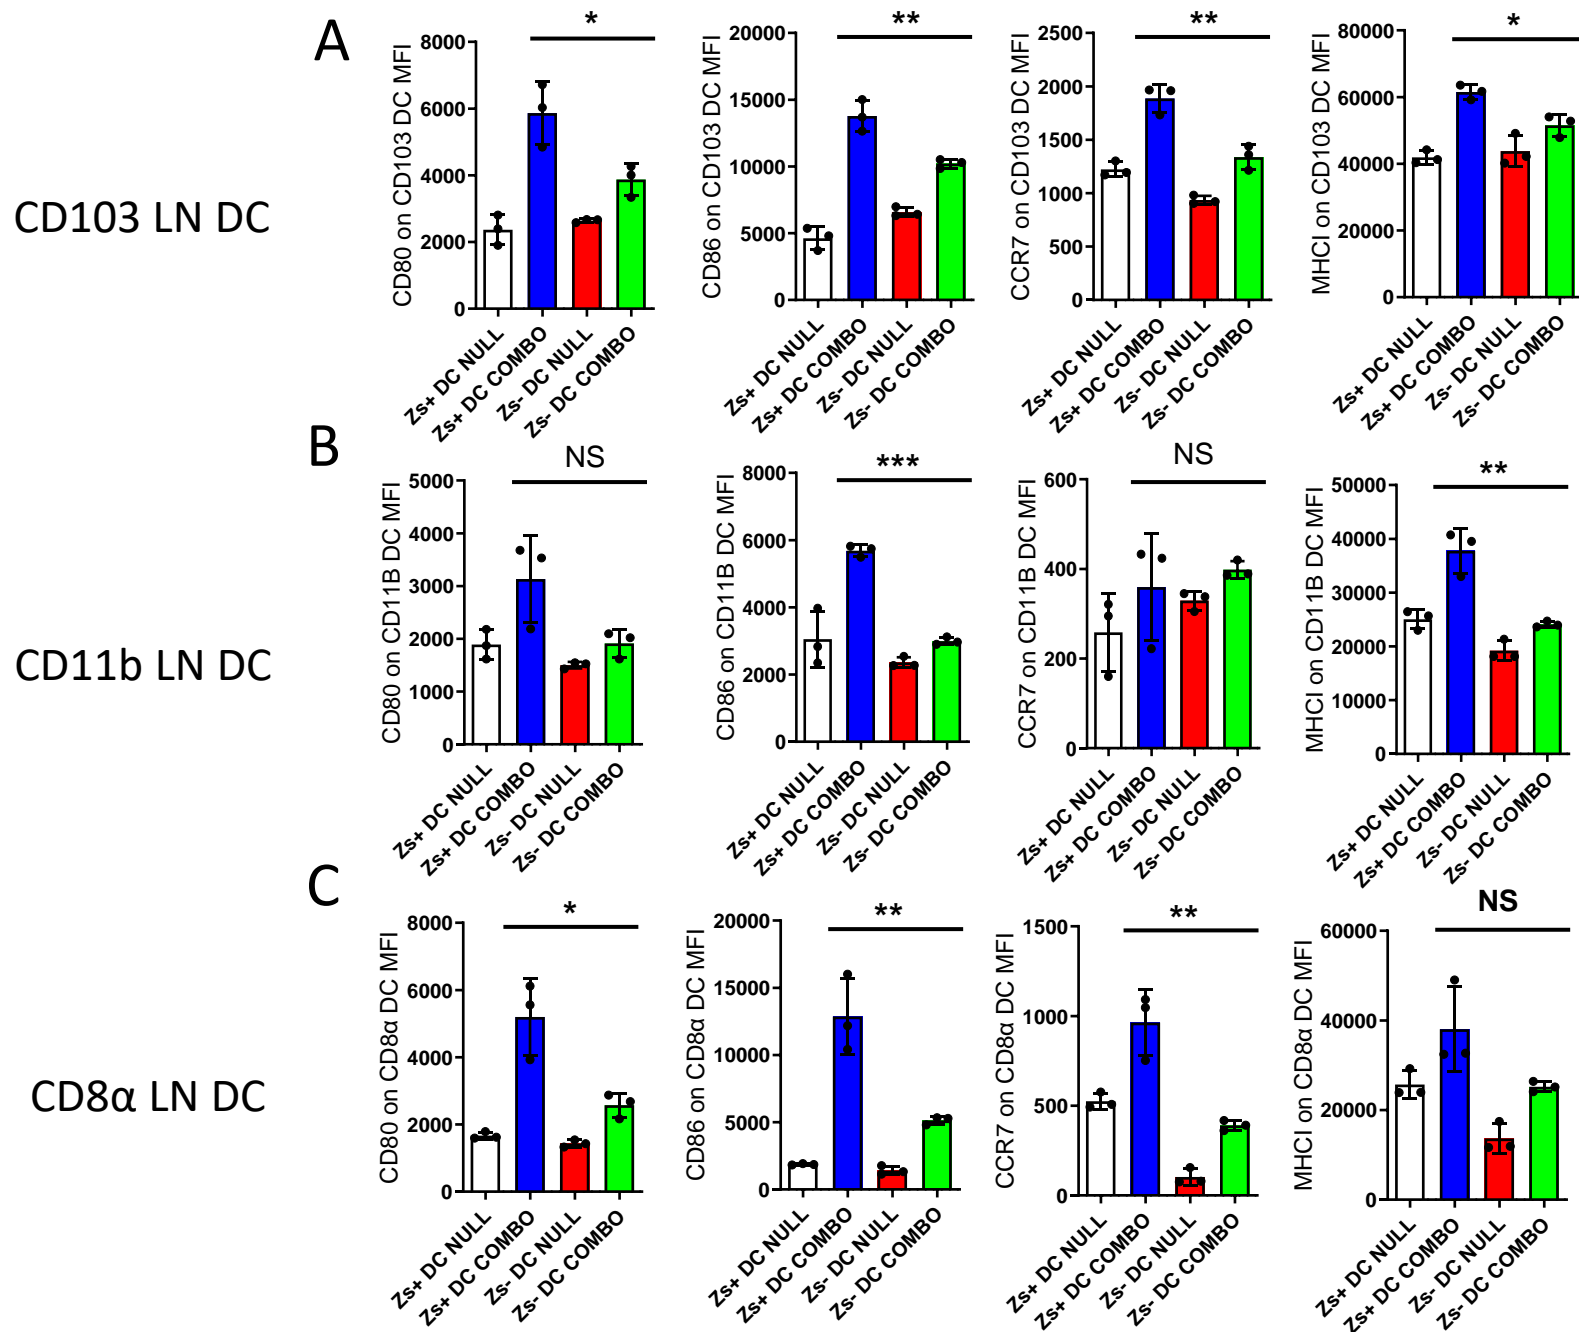

**Supplementary Fig. 8. MEM40 and IFN $\beta$  impact on lymph node cDC.** Expression of indicated markers were separately assessed on Zs-Green<sup>+</sup> and Zs-Green<sup>-</sup> in (A) CD103<sup>+</sup>LN cDC1, (B) CD11b<sup>+</sup>LN cDC2, and (C) CD8 $\alpha$ <sup>+</sup>LN cDC1. T-test was used to determine significance of differences and indicated by p-values \*p<0.05, \*\*p<0.01, \*\*\*p<0.001. NS: not significant.



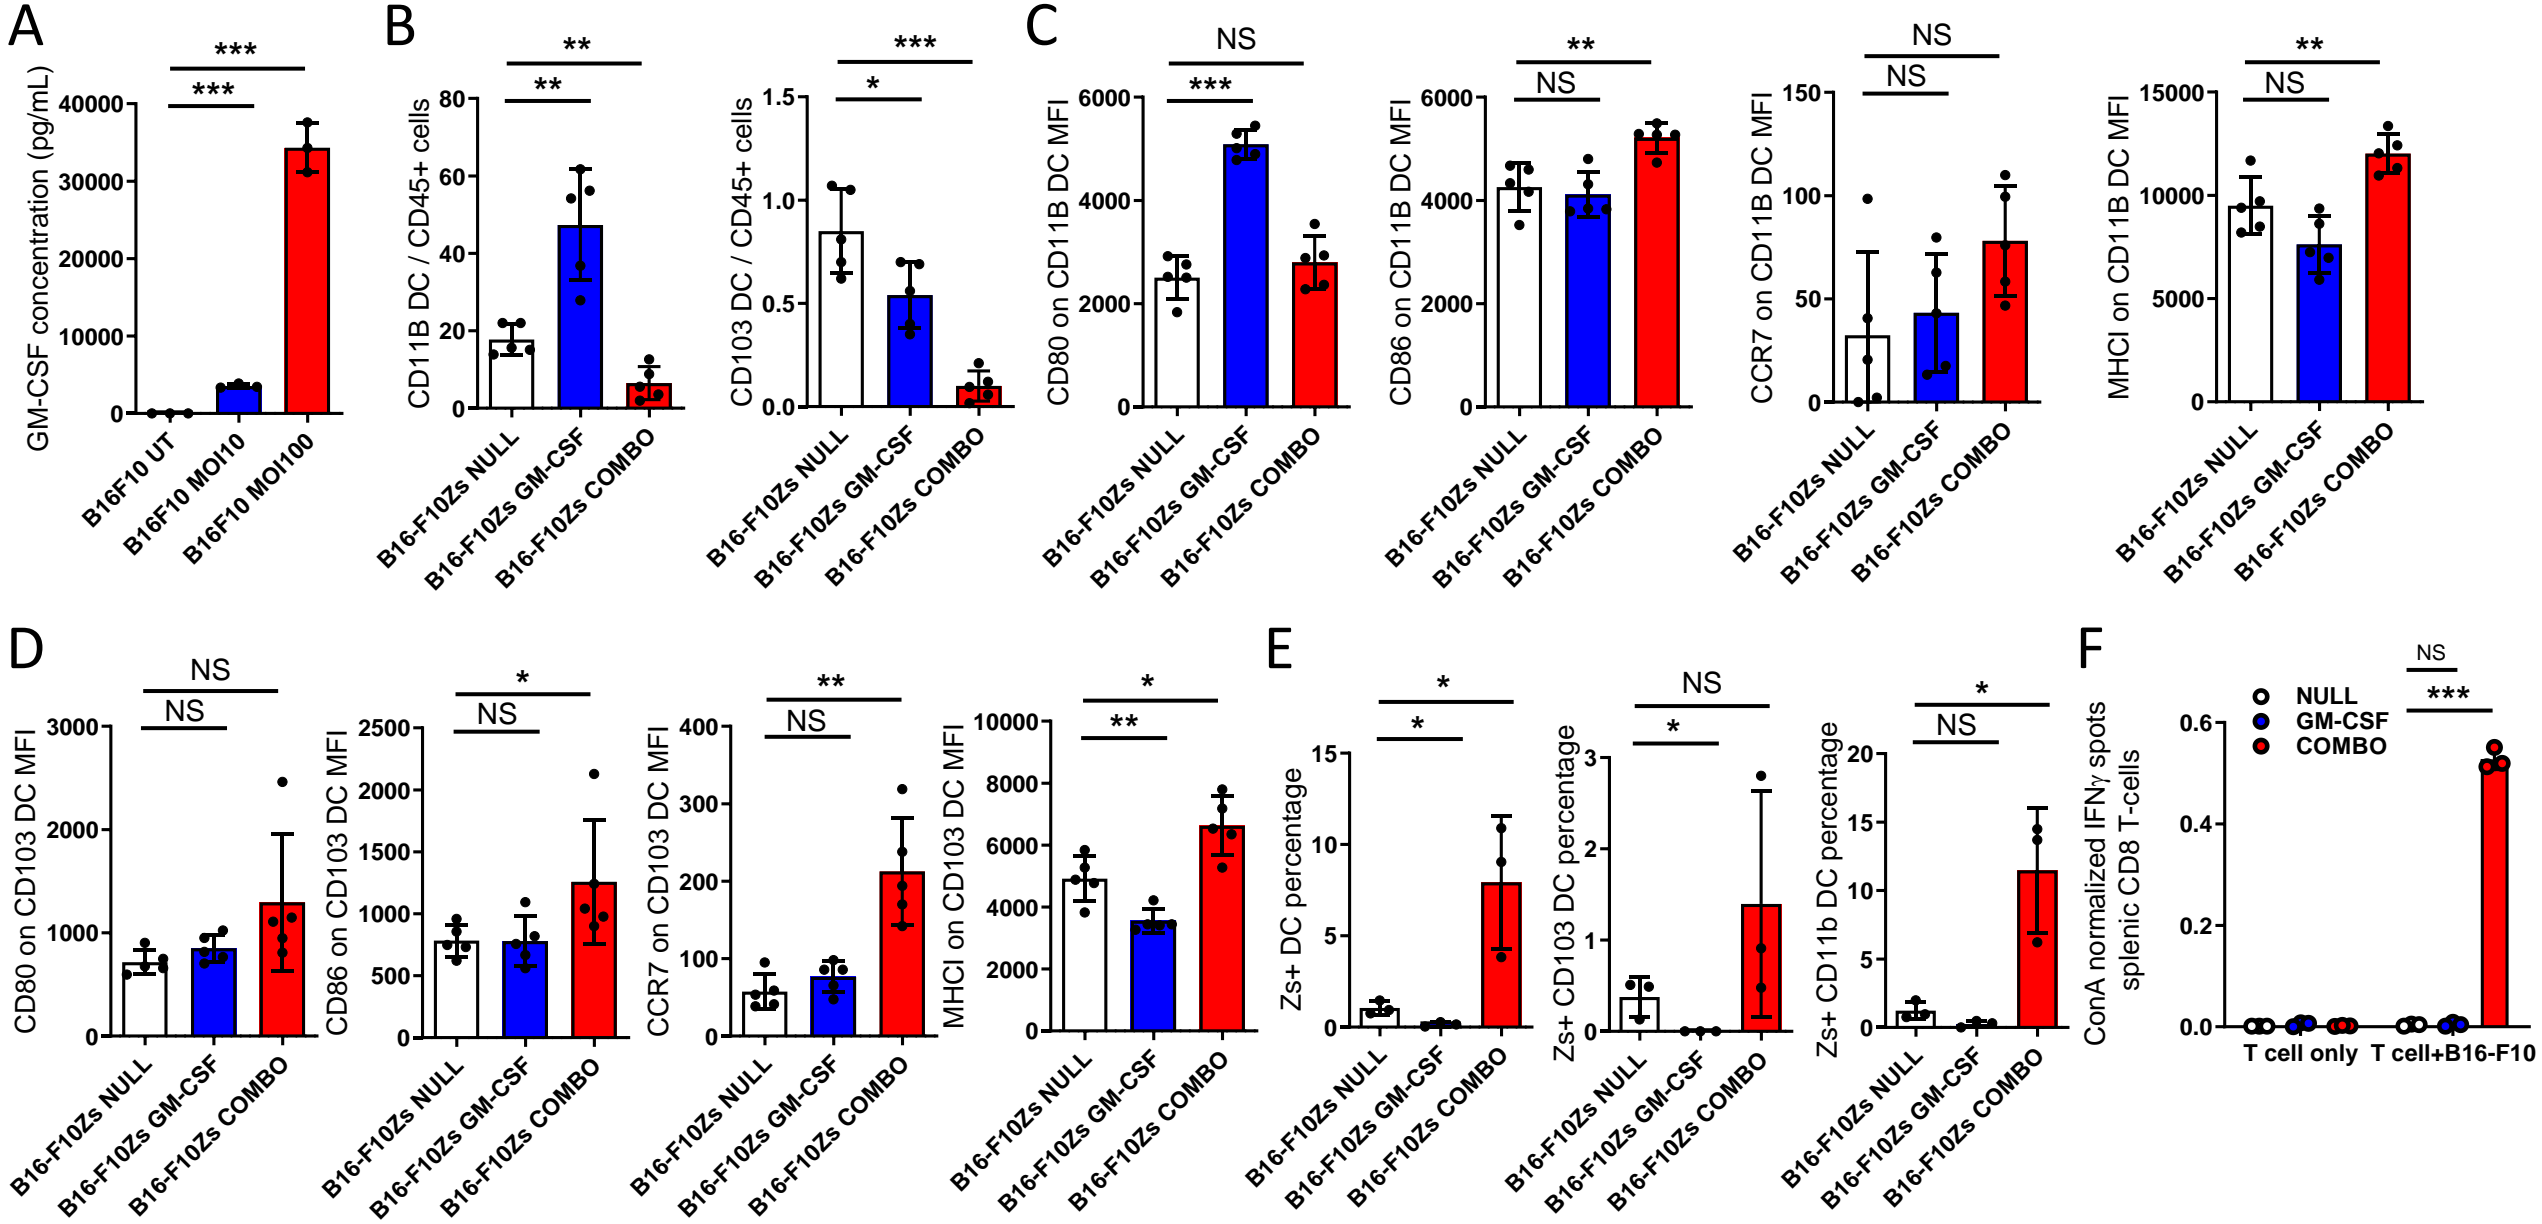

**Supplementary Fig. 9. MEM40 and IFN $\beta$  versus GM-CSF in tumor and lymph node cDC.** (A) B16-F10 cells were infected with adenoviruses Ad-Null or Ad-GM-CSF at MOI=10 and 100. Secretion of GM-CSF was detected by ELISA. (B) Presence of CD11b<sup>+</sup>cDC2 and CD103<sup>+</sup>cDC1 in B16-F10-ZsGreen tumors 3 days after Ad-Null, Ad-GM-CSF and Ad-MEM40 + Ad-IFN $\beta$  (Ad-COMBO) virus treatments. (C) Expression of indicated markers on tumor CD11b<sup>+</sup>cDC2. (D) Expression of indicated markers on tumor CD103<sup>+</sup>cDC1. (E) Zs-Green<sup>+</sup> presence on total, CD103<sup>+</sup> and CD11b<sup>+</sup> dLN cDCs. (F) Comparison of T cell activation of Ad-Null, Ad-GM-CSF or Ad-COMBO by ELISPOT. T-test was used to determine significance of differences and indicated by p-values \*p<0.05, \*\*p<0.01, \*\*\*p<0.001. NS: not significant.

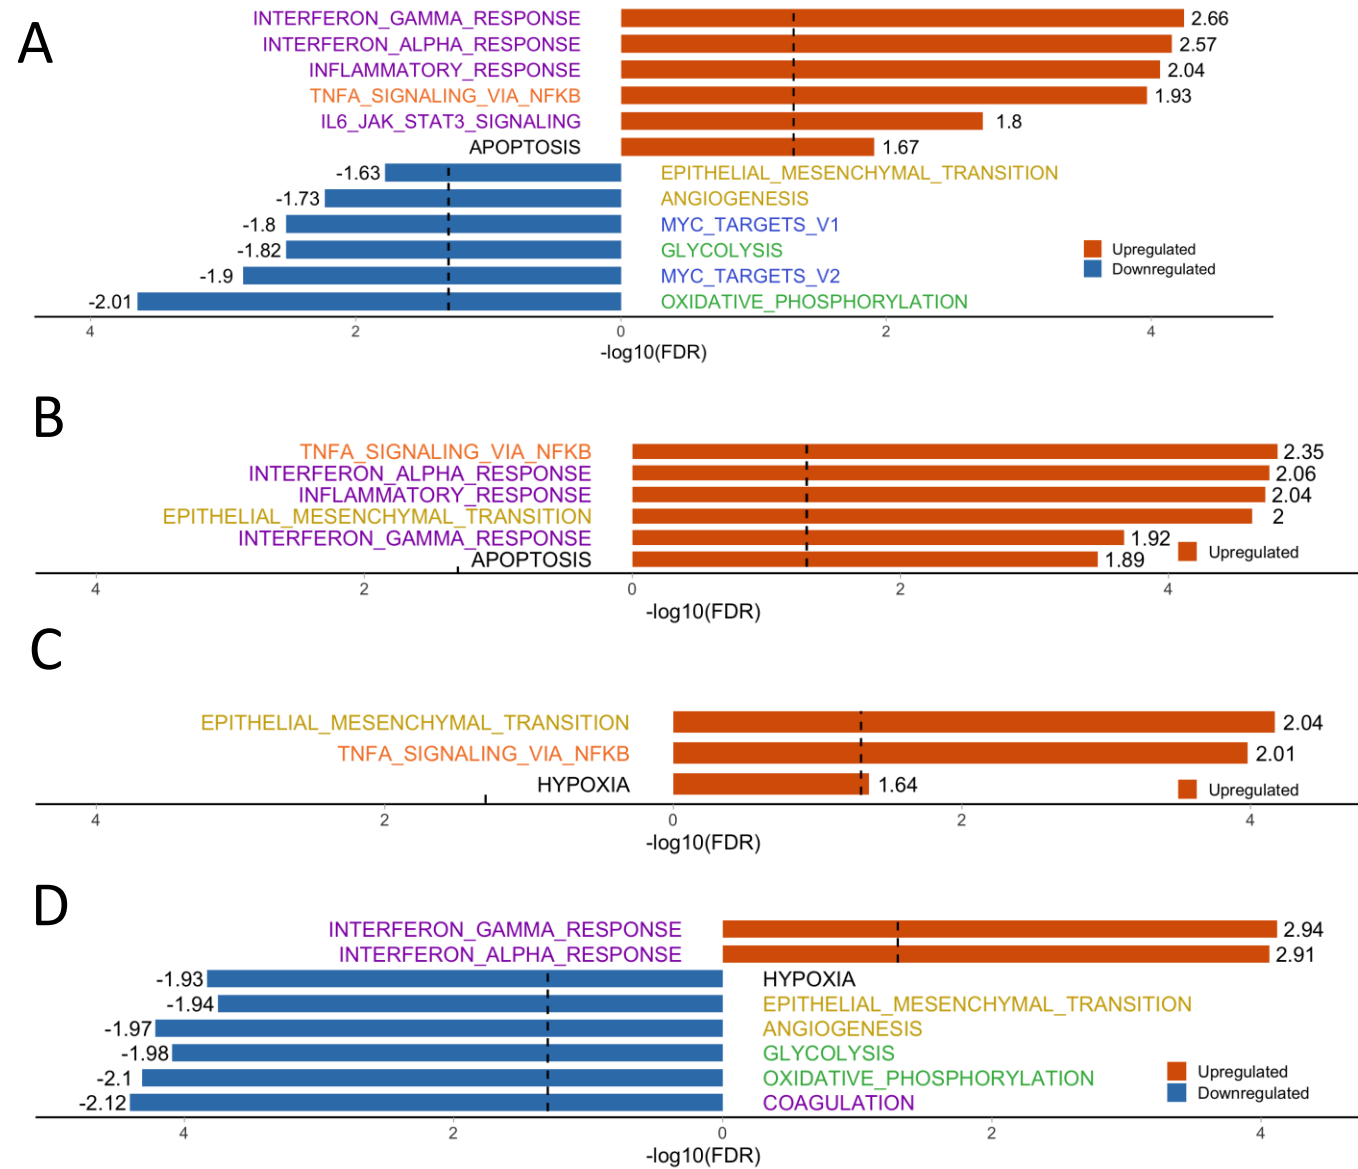

**Supplementary Fig. 10. Pathway analysis in human DCs.** RNA-seq was used to determine changes in gene expression in HLA-DR<sup>+</sup>CD11c<sup>+</sup> sorted DCs derived from monocytes of 3 healthy donors. Hallmark pathway analysis was used to determine differences in pathway activation in (A) IFN $\beta$  vs NULL , (B) MEM40 vs NULL, (C) COMBO vs IFN $\beta$ , (D) COMBO vs MEM40.

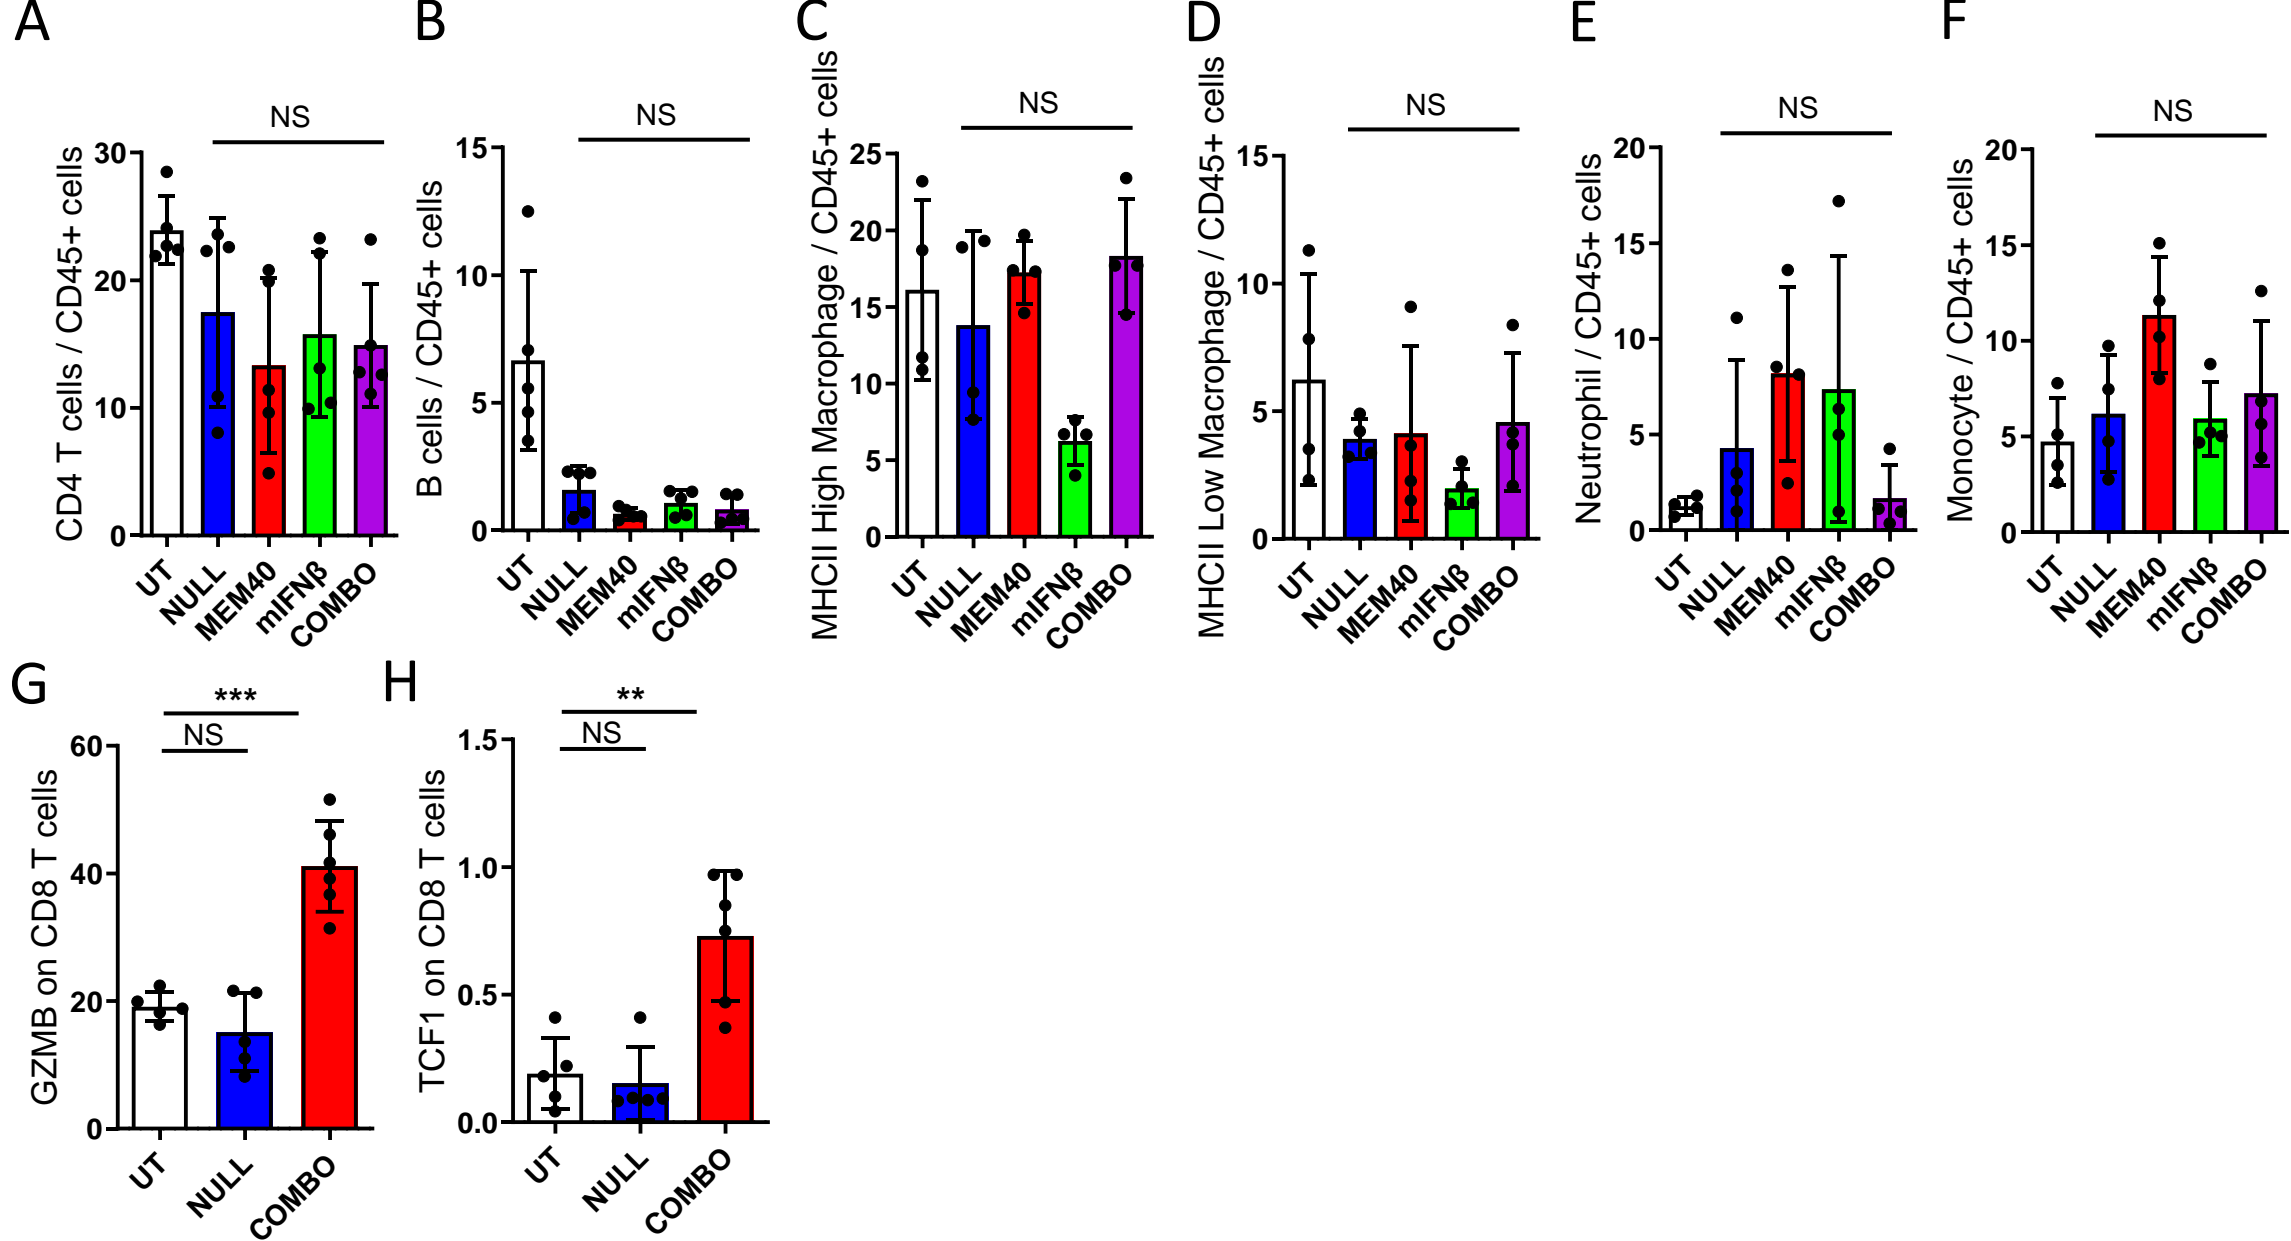

**Supplementary Fig. 11. MEM40 and IFN $\beta$  impact on CD4<sup>+</sup> T cells, B cells and myeloid cells.** Results from experiment shown in Fig. 4 indicating levels of (A) CD4<sup>+</sup>T cells, (B) CD19<sup>+</sup> B cells, (C) MHC-II<sup>high</sup> macrophages (F4/80<sup>+</sup>Ly6C<sup>+</sup>Ly6G<sup>-</sup>MHCII<sup>high</sup>), (D) MHC-II<sup>low</sup> macrophages (F4/80<sup>+</sup>Ly6C<sup>+</sup>Ly6G<sup>-</sup>MHCII<sup>low</sup>), (E) neutrophils (F4/80<sup>+</sup>CD11c<sup>-</sup>CD11b<sup>+</sup>Ly6C<sup>+</sup>Ly6G<sup>+</sup>) and (F) monocytes (F4/80<sup>+</sup>CD11c<sup>-</sup>CD11b<sup>+</sup>Ly6C<sup>+</sup>Ly6G<sup>-</sup>). Mice were injected with B16 tumors and treated with Ad-Null or Ad-MEM40 + Ad-IFN $\beta$  (COMBO). Tumors were collected 10 days after the second virus infection and analyzed by flow cytometry. The intracellular markers (G) GZMB and (H) TCF1 on tumor CD8 T cells are indicated. T-test was used to determine significance of differences and indicated by p-values \*p<0.05, \*\*p<0.01, \*\*\*p<0.001 NS: not significant.

A

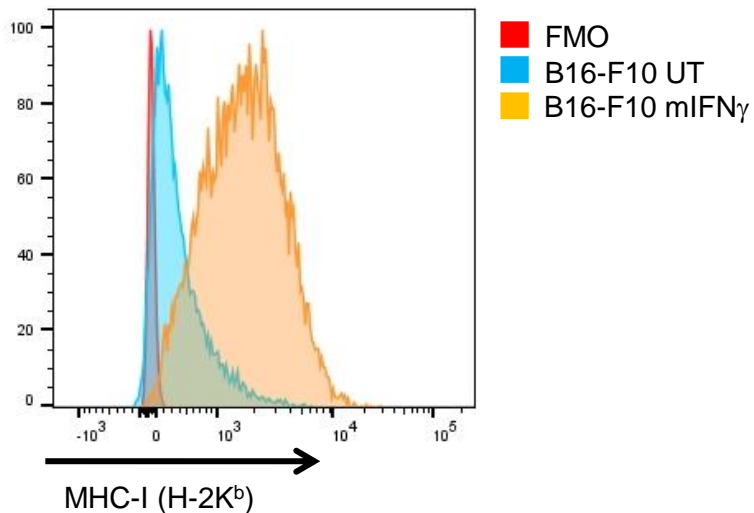

B

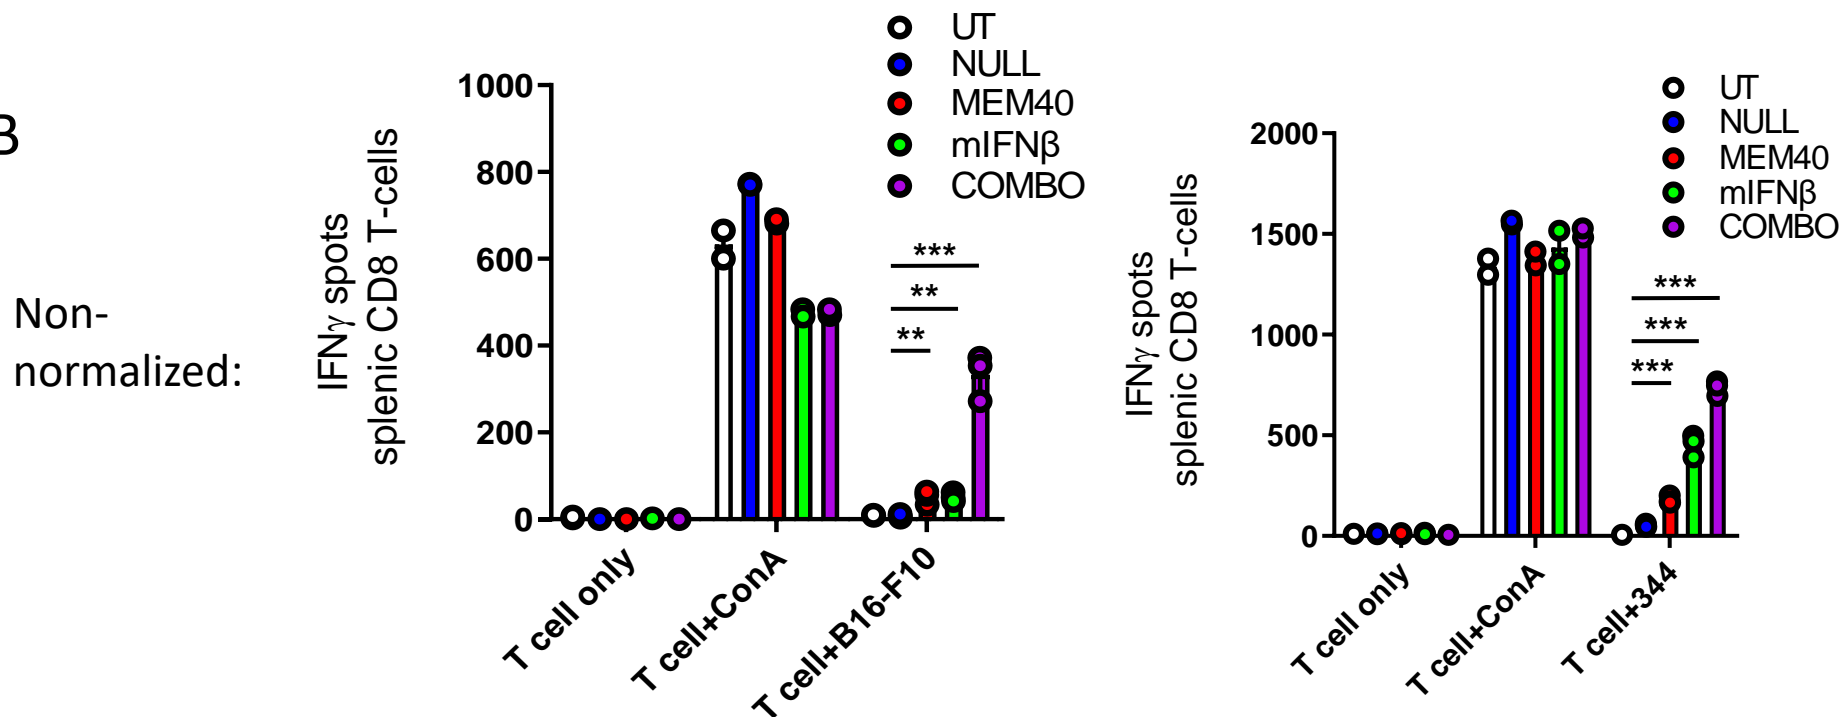

**Supplementary Fig. 12. ELISPOT assay.** (A) ELISPOT studies used IFN $\gamma$  treatment of tumor cells to increase MHC-I expression. Shown here is the impact of 6 hr IFN $\gamma$  treatment on MHC-I expression in B16-F10. (B) Non-normalized ELISPOT results showing spot numbers in data from Fig. 4E, I.

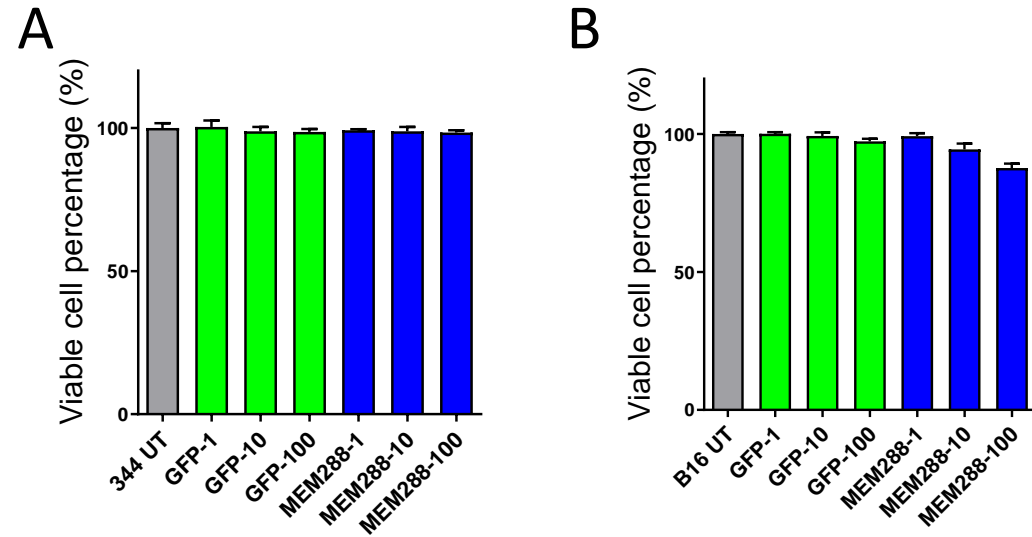

**Supplementary Fig. 13. MEM-288 oncolytic effects.** (A) 344 (A) and (B) B16-F10 mouse tumor cell lines were infected with indicated oncolytic viruses Ad-GFP (GFP) or MEM-288 at different indicated MOIs (1, 10, 100) for 2 days. Cell viability was determined by trypan blue staining assay.



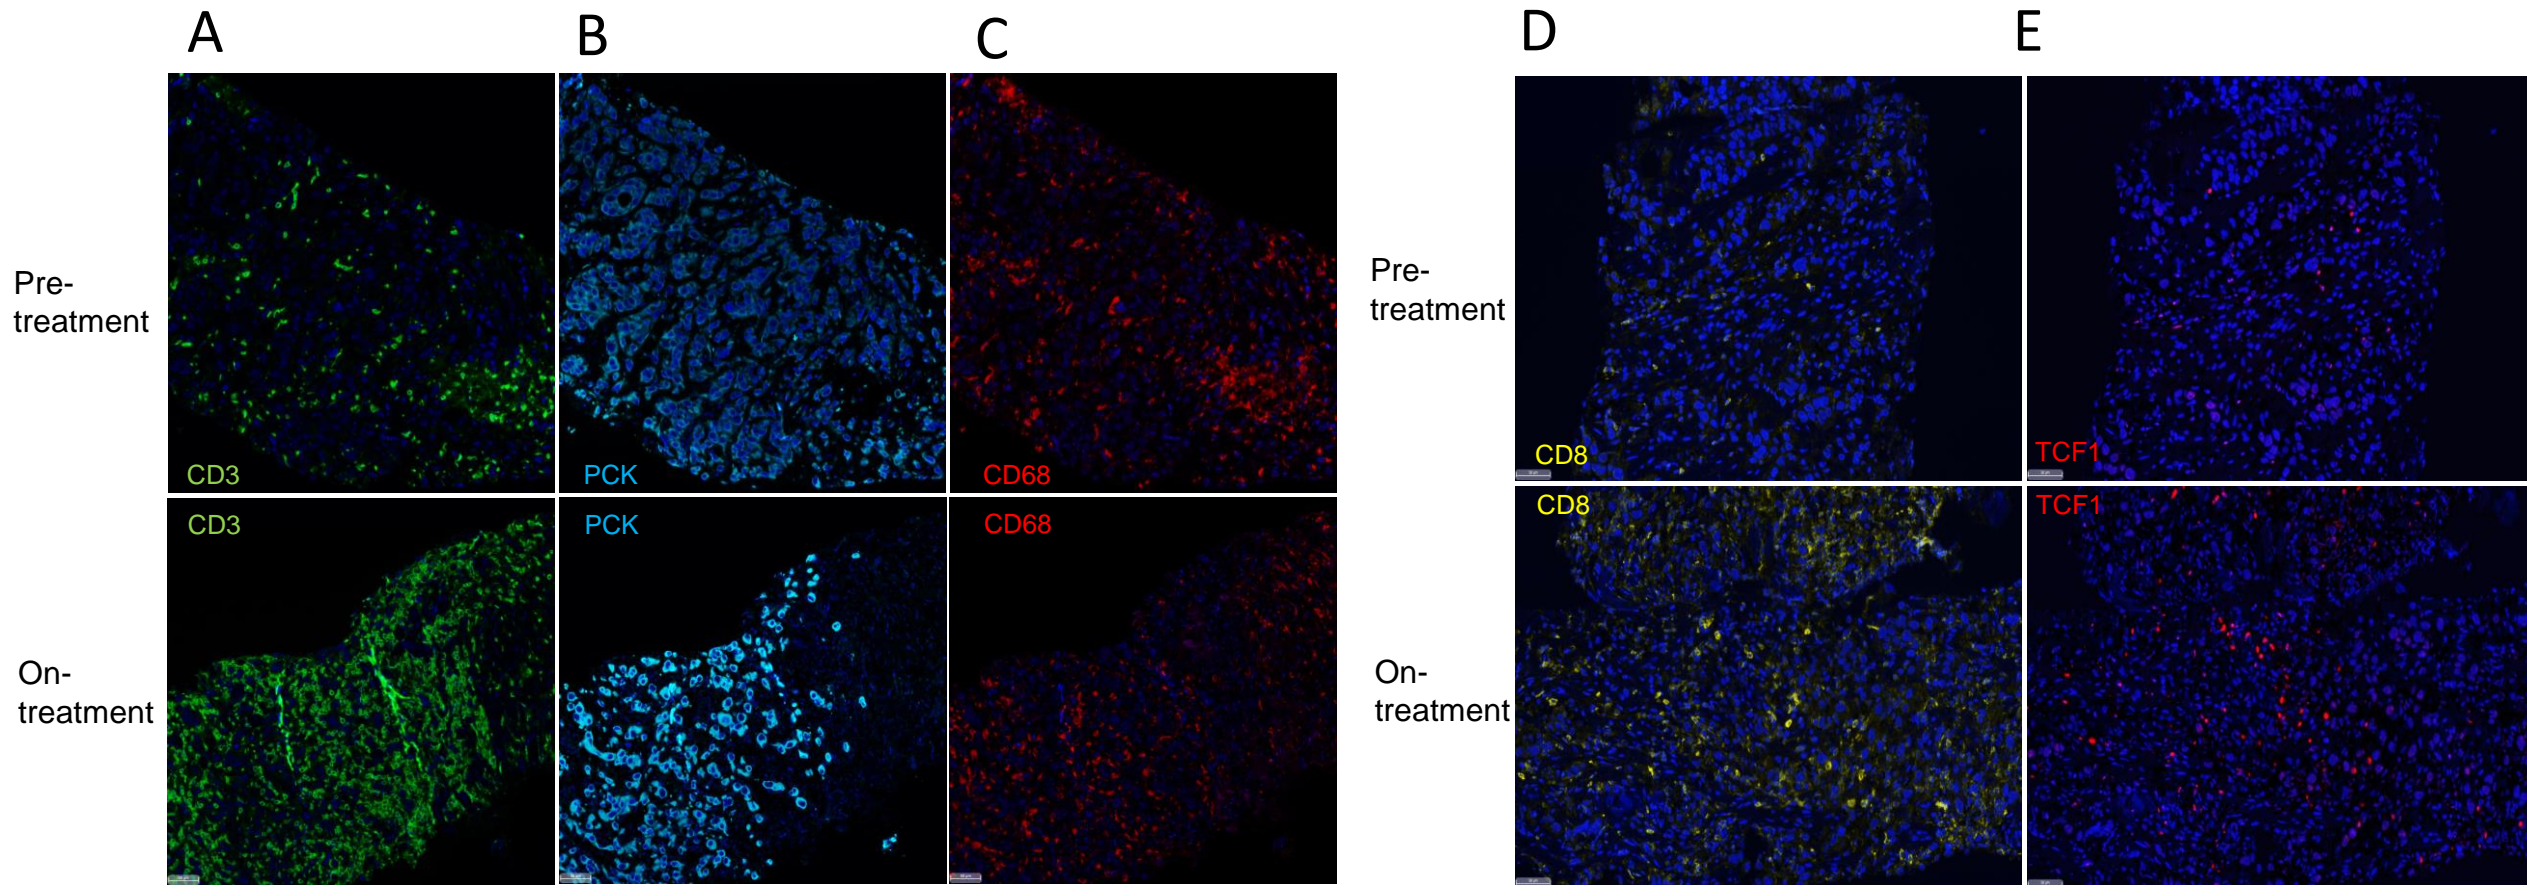

**Supplementary Fig. 14. MEM-288 modulation of the TME and systemic T cell immunity in NSCLC.** Single-color images of pre- and on-treatment biopsies with indicated markers and DAPI. A, B and C top-panel correspond to the **Figure 7A** image. A, B and C bottom-panel correspond to the **Figure 7B** image. D and E top-panel correspond to the **Figure 7C** image. D and E bottom-panel correspond to the **Figure 7D** image.
