# Supplementary material
Source: PubMed Central journal article supplement (PMC10165690)
Supplement: NIHMS1874406-supplement-2.pdf [file NIHMS1874406-supplement-2.pdf]

## **Supplementary Table Legends**

**Supplementary Table S1.** Antibodies used for flow cytometry and mIF studies.

**Supplementary Table S2.** Differential gene expression analysis of mregDC clusters (6 and 9) from scRNA-seq analysis in Fig. 1.

**Supplementary Table S3.** Bulk RNA-seq gene expression analysis of human monocyte-derived DCs (Fig. 3). Healthy donors are indicated as D1, D2 and D3. Treatments were Ad-Null, Ad-MEM40, Ad-IFN $\beta$  and Ad-MEM40 + Ad-IFN $\beta$  (COMBO)
